# Supplementary material for: Laquinimod rescues striatal, cortical and white matter pathology and results in modest behavioural improvements in the YAC128 model of Huntington disease
Source: PubMed Central journal article supplement (PMC4985819; doi:10.1038/srep31652), 2016-08-16
Supplement: srep31652-s1.pdf [file srep31652-s1.pdf]

**Laquinimod rescues striatal, cortical and white matter pathology and results in modest behavioural improvements in the YAC128 model of Huntington disease**

Marta Garcia-Miralles, Xin Hong, Liang Juin Tan, Nicholas S. Caron, Yihui Huang, Xuan Vinh To, Rachel Yanping Lin, Sonia Franciosi, Spyros Papapetropoulos, Liat Hayardeny, Michael R. Hayden, Kai-Hsiang Chuang, Mahmoud A. Pouladi

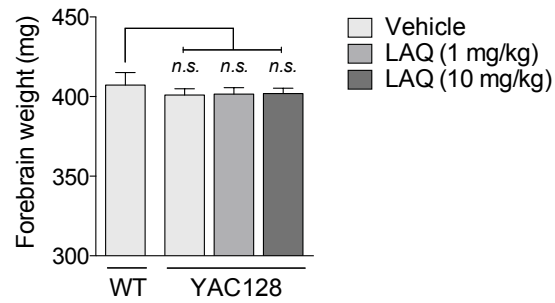

**Supplementary Figure 1. Forebrain weight of vehicle- and laquinimod-treated YAC128 HD mice.**

The forebrain weight of vehicle-treated YAC128 HD mice did not differ from that of vehicle-treated WT mice. Treatment with laquinimod had no effect on forebrain weight in YAC128 HD mice. Values shown as mean. Error bars represent the standard error of the mean; n = 9 WT-vehicle, n = 15 YAC128-vehicle, n = 16 YAC128-laquinimod (1 mg/kg), n = 20 YAC128-laquinimod (10 mg/kg); LAQ – laquinimod.

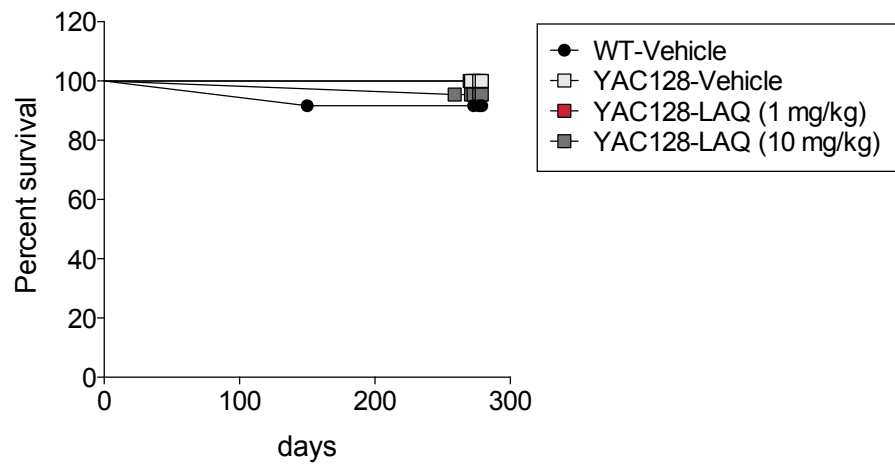

**Supplementary Figure 2. Survival analysis for vehicle- and laquinimod-treated YAC128 and vehicle-treated WT mice.**

Survival analysis reveals no differences between vehicle-treated YAC128 and WT mice, and no effect of laquinimod treatment on survival in YAC128 HD mice.

**Supplementary Table 1. Accelerating rotarod sample size at each analysis point.**

|          |                | Accelerating rotarod sample size |   |    |          |   |    |          |   |    |          |   |    |
|----------|----------------|----------------------------------|---|----|----------|---|----|----------|---|----|----------|---|----|
|          |                | 2 months                         |   |    | 4 months |   |    | 6 months |   |    | 8 months |   |    |
| Genotype | Treatment      | F                                | M | N  | F        | M | N  | F        | M | N  | F        | M | N  |
| WT       | Vehicle        | 6                                | 6 | 12 | 6        | 6 | 12 | 5        | 5 | 10 | 5        | 5 | 10 |
| YAC128   | Vehicle        | 8                                | 8 | 16 | 8        | 8 | 16 | 8        | 8 | 16 | 8        | 8 | 16 |
| YAC128   | LAQ (1 mg/kg)  | 11                               | 8 | 19 | 11       | 8 | 19 | 11       | 8 | 19 | 11       | 8 | 18 |
| YAC128   | LAQ (10 mg/kg) | 13                               | 9 | 22 | 13       | 9 | 22 | 13       | 9 | 22 | 13       | 8 | 21 |

**Supplementary Table 2. Climbing test (time climbing) sample size at each analysis point.**

|          |                | Climbing test sample size (time climbing) |   |    |          |   |    |          |   |    |          |   |    |
|----------|----------------|-------------------------------------------|---|----|----------|---|----|----------|---|----|----------|---|----|
|          |                | 3 months                                  |   |    | 4 months |   |    | 6 months |   |    | 8 months |   |    |
| Genotype | Treatment      | F                                         | M | N  | F        | M | N  | F        | M | N  | F        | M | N  |
| WT       | Vehicle        | 5                                         | 6 | 11 | 6        | 6 | 12 | 5        | 6 | 11 | 5        | 5 | 10 |
| YAC128   | Vehicle        | 5                                         | 8 | 13 | 8        | 6 | 14 | 7        | 7 | 14 | 7        | 8 | 15 |
| YAC128   | LAQ (1 mg/kg)  | 10                                        | 8 | 18 | 11       | 8 | 19 | 9        | 8 | 17 | 10       | 8 | 18 |
| YAC128   | LAQ (10 mg/kg) | 12                                        | 9 | 21 | 13       | 9 | 22 | 9        | 9 | 17 | 12       | 8 | 21 |

**Supplementary Table 3. Climbing test (latency to climb) sample size at each analysis point.**

|          |                | Climbing test sample size (latency to climb) |   |    |          |   |    |          |   |    |          |   |    |
|----------|----------------|----------------------------------------------|---|----|----------|---|----|----------|---|----|----------|---|----|
|          |                | 3 months                                     |   |    | 4 months |   |    | 6 months |   |    | 8 months |   |    |
| Genotype | Treatment      | F                                            | M | N  | F        | M | N  | F        | M | N  | F        | M | N  |
| WT       | Vehicle        | 5                                            | 5 | 10 | 6        | 5 | 11 | 6        | 5 | 11 | 5        | 5 | 10 |
| YAC128   | Vehicle        | 5                                            | 8 | 13 | 8        | 6 | 14 | 6        | 6 | 12 | 8        | 8 | 16 |
| YAC128   | LAQ (1 mg/kg)  | 11                                           | 8 | 19 | 11       | 8 | 19 | 11       | 8 | 19 | 11       | 8 | 19 |
| YAC128   | LAQ (10 mg/kg) | 13                                           | 9 | 22 | 13       | 9 | 22 | 10       | 9 | 19 | 13       | 9 | 22 |

**Supplementary Table 4. Forced swim test sample size at 8 months of age.**

|          |                | Forced swim test sample size |   |    |
|----------|----------------|------------------------------|---|----|
|          |                | 8 months                     |   |    |
| Genotype | Treatment      | F                            | M | N  |
| WT       | Vehicle        | 5                            | 5 | 10 |
| YAC128   | Vehicle        | 8                            | 7 | 15 |
| YAC128   | LAQ (1 mg/kg)  | 10                           | 7 | 17 |
| YAC128   | LAQ (10 mg/kg) | 11                           | 9 | 20 |
